# Supplementary material
Source: PubMed Central journal article supplement (PMC4976001)
Supplement: NIHMS795006-supplement-1.pdf [file NIHMS795006-supplement-1.pdf]

### Correlation between predicted affinity and predicted stability

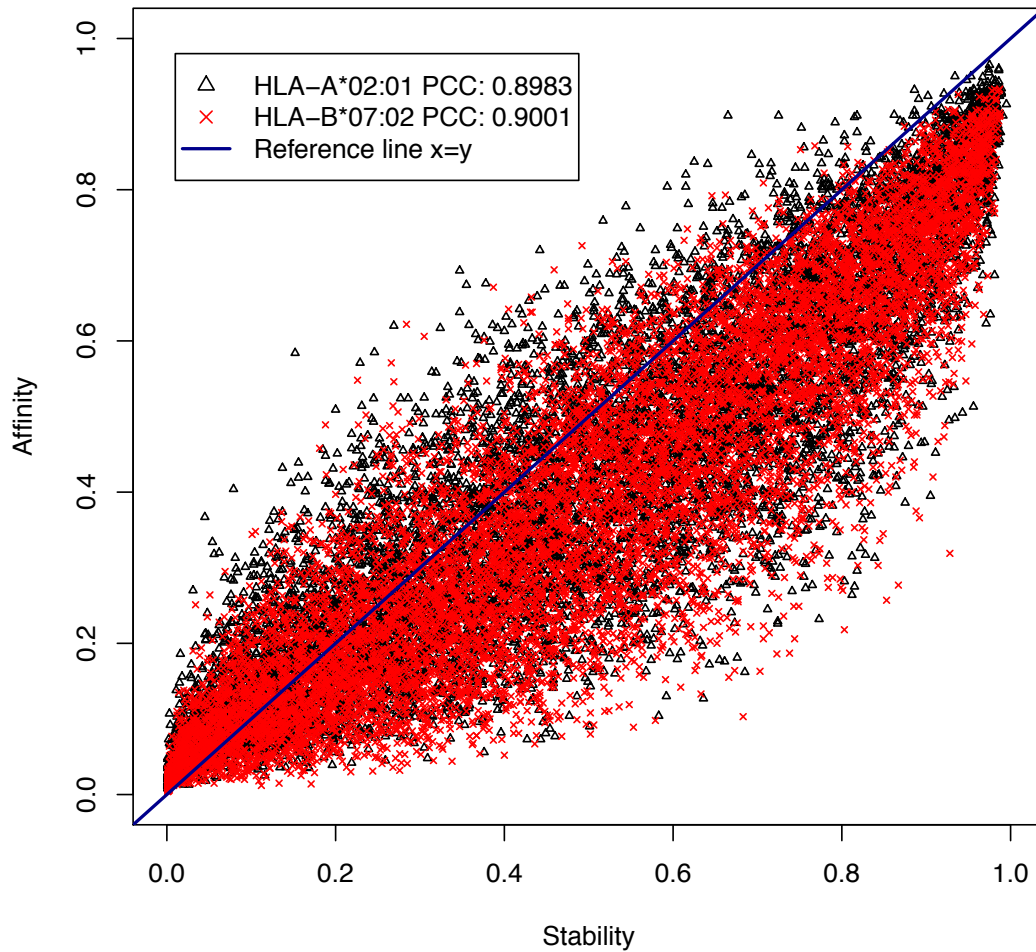

**Supplementary Figure 1. Correlation between predicted stability and affinity.** Example of the correlation between predicted binding stability and binding affinity obtained from 10,000 random natural 9mer peptides for HLA-A\*02:01 and HLA-B\*07:02. The straight line  $x=y$  is a guide to the eye. Affinity predictions were made using NetMHCpan-2.8, and stability predictions were made using NetMHCstabpan-1.0.
